# Supplementary material for: Impact of COVID-19 on Immunization Services for Maternal and Infant Vaccines: Results of a Survey Conducted by Imprint—The Immunising Pregnant Women and Infants Network
Source: MDPI journal article supplement (doi:10.3390/vaccines8030556), 2020-09-22
Supplement: s1 [file s1]

## IMPRINT-survey for COVID-19

Routine immunisations for pregnant women and infants in times of COVID-19- a short IMPRINT network survey

\* Required

Email address \*

Your email

Which country are you reporting from? \*

Your answer

What is the most fitting description of your job? \*

- ☐ Healthcare Professional (doctor, nurse, midwife; hospital- or community-based)
- ☐ Public Health official
- ☐ Laboratory-based Researcher/Scientist
- ☐ Private healthcare provider
- ☐ Other

If you clicked 'Other', please specify:

Your answer

When was the first case of COVID-19 described in your country? (estimated date sufficient)

MM DD YYYY

/ /

How many cases are recorded in your country by the time you fill this in?

Your answer

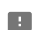

Request edit access

What vaccines are routinely used in pregnant women in your country? (You may click more than one answer)

|                 | Tetanus only             | Pertussis/TdaP           | Influenza                | None                     |
|-----------------|--------------------------|--------------------------|--------------------------|--------------------------|
| <b>Vaccines</b> | <input type="checkbox"/> | <input type="checkbox"/> | <input type="checkbox"/> | <input type="checkbox"/> |

Who normally gives the vaccines to pregnant women in your country? (You may click more than one answer)

|                  | Midwives in antenatal clinics | Obstetricians/gynaecologists | Family doctor/GP         | Private clinics          | Other                    |
|------------------|-------------------------------|------------------------------|--------------------------|--------------------------|--------------------------|
| <b>Providers</b> | <input type="checkbox"/>      | <input type="checkbox"/>     | <input type="checkbox"/> | <input type="checkbox"/> | <input type="checkbox"/> |

If you clicked 'Other', please specify:

Your answer

Are you aware of any issues in delivering these vaccines successfully during the COVID-19 pandemic? \*

- ☐ Yes
- ☐ No
- ☐ Don't know

If you answered yes to the above question, please provide some detail below (e.g. administration problems, rescheduling, staff shortage, parental concerns, social/logistical barriers, others):

Your answer

Which vaccines are given to newborns in your country? (You may click more than one answer)

|                                | BCG                      | Hepatitis B              | Polio                    | None                     |
|--------------------------------|--------------------------|--------------------------|--------------------------|--------------------------|
| <b>Birth doses of vaccines</b> | <input type="checkbox"/> | <input type="checkbox"/> | <input type="checkbox"/> | <input type="checkbox"/> |

Who normally gives the vaccines to the newborns in your country? (You may click more than one answer)

|                  | Midwives at time of birth | EPI clinics              | Family Doctor/GP         | Paediatricians           | Private clinics          | Other                    |
|------------------|---------------------------|--------------------------|--------------------------|--------------------------|--------------------------|--------------------------|
| <b>Providers</b> | <input type="checkbox"/>  | <input type="checkbox"/> | <input type="checkbox"/> | <input type="checkbox"/> | <input type="checkbox"/> | <input type="checkbox"/> |

[Request edit access](#)

If you clicked 'Other', please specify:

Your answer

Are you aware of any issues in delivering these vaccines successfully during the COVID-19 pandemic? \*

- ☐ Yes
- ☐ No
- ☐ Don't know

If you answered yes to the above question, please provide some detail below (e.g. administration problems, rescheduling, staff shortage, parental concerns, social/logistical barriers, others):

Your answer

Who gives the routine childhood vaccinations to infants and toddlers in your country? (You may click more than one answer)

|                  | EPI clinics              | Family Doctor/GP         | Paediatricians           | Private clinics          | Other                    |
|------------------|--------------------------|--------------------------|--------------------------|--------------------------|--------------------------|
| <b>Providers</b> | <input type="checkbox"/> |

If you clicked 'Other', please specify:

Your answer

Are you aware of any issues in delivering these vaccines successfully during the COVID-19 pandemic? \*

- ☐ Yes
- ☐ No
- ☐ Don't know

If you answered yes to the above question, please provide some detail below (e.g. administration problems, rescheduling, staff shortage, parental concerns, social/logistical barriers, others):

Your answer

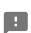

[Request edit access](#)

Has any guidance for regular immunisation services during the COVID-19 epidemic been issued at the national level? \*

- ☐ Yes
- ☐ No
- ☐ Don't know

Has any guidance for regular immunisation services during the COVID-19 epidemic been issued at the regional and/or local level? \*

- ☐ Yes
- ☐ No
- ☐ Don't know

Please share details of any local, regional or national guidelines and/or special measures if they have been put in place (including any useful links):

Your answer

☐ Send me a copy of my responses.

Submit

Never submit passwords through Google Forms.

reCAPTCHA  
[Privacy](#) [Terms](#)

This content is neither created nor endorsed by Google. [Report Abuse](#) - [Terms of Service](#) - [Privacy Policy](#)

Google Forms



Request edit access

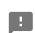

 [Request edit access](#)
