# Supplementary material for: Impact of COVID-19 on Immunization Services for Maternal and Infant Vaccines: Results of a Survey Conducted by Imprint—The Immunising Pregnant Women and Infants Network
Source: MDPI journal article supplement (doi:10.3390/vaccines8030556), 2020-09-22
Supplement: s1 [file s1]

## Supplementary Materials

**Table S1.** Region, country of origin and occupation of respondents ( $n = 48$ ).

| REGION                                       | COUNTRY            | NUMBER OF<br>RESPONDENTS | OCCUPATION:<br>HEALTHCARE<br>PROFESSIONAL | OCCUPATION:<br>LABORATORY<br>BASED<br>SCIENTIST | OCCUPATION:<br>OTHER | OCCUPATION:<br>PUBLIC<br>HEALTH |
|----------------------------------------------|--------------------|--------------------------|-------------------------------------------|-------------------------------------------------|----------------------|---------------------------------|
| AFRICA<br>( $N = 30$ )                       | Cameroon           | 2                        | 1                                         | 1                                               | 0                    | 0                               |
|                                              | Malawi             | 4                        | 3                                         | 0                                               | 1                    |                                 |
|                                              | Nigeria            | 8                        | 4                                         | 2                                               | 0                    | 2                               |
|                                              | South<br>Africa    | 4                        | 2                                         | 1                                               | 1                    | 0                               |
|                                              | Sudan              | 1                        | 0                                         | 0                                               | 1                    | 0                               |
|                                              | Tanzania           | 2                        | 1                                         | 0                                               | 0                    | 1                               |
|                                              | The Gambia         | 3                        | 2                                         | 0                                               | 1                    | 0                               |
|                                              | Uganda             | 4                        | 3                                         | 1                                               | 0                    | 0                               |
|                                              | Zambia             | 2                        | 0                                         | 2                                               | 0                    | 0                               |
| ASIA ( $N = 4$ )                             | India              | 2                        | 1                                         | 0                                               | 1                    | 0                               |
|                                              | Nepal              | 2                        | 0                                         | 1                                               | 0                    | 0                               |
| CENTRAL<br>& SOUTH<br>AMERICA<br>( $N = 2$ ) | Costa Rica         | 1                        | 1                                         | 0                                               | 0                    | 0                               |
|                                              | Brazil             | 1                        | 0                                         | 1                                               | 0                    | 0                               |
| NORTH<br>AMERICA<br>( $N = 2$ )              | Canada             | 2                        | 2                                         | 0                                               | 0                    | 0                               |
| EUROPE<br>( $N = 10$ )                       | Belgium            | 1                        | 0                                         | 0                                               | 0                    | 1                               |
|                                              | Greece             | 2                        | 2                                         | 0                                               | 0                    | 0                               |
|                                              | The<br>Netherlands | 1                        | 1                                         | 0                                               | 0                    | 0                               |
|                                              | United<br>Kingdom  | 6                        | 3                                         | 2                                               | 0                    | 1                               |
